# Supplementary material
Source: PubMed Central journal article supplement (PMC8034208)
Supplement: jcsm.8700.ds001.pdf [file jcsm.8700.ds001.pdf]

**Table S1. Descriptive statistics for all adult patients with either ischemic stroke, transient ischemic attack, intracerebral hemorrhage, or subarachnoid hemorrhage stratified by whether or not they were included in the analysis.**

|                                                          | <b>All Patients</b> | <b>Included in Analysis</b> | <b>Excluded from Analysis</b> | <b>P-value</b> |
|----------------------------------------------------------|---------------------|-----------------------------|-------------------------------|----------------|
| <b>N</b>                                                 | 4149                | 2190                        | 1959                          |                |
| <b>Age, mean (SD)</b>                                    | 62.2 (14.8)         | 60.7 (14.8)                 | 63.9 (14.7)                   | < 0.001        |
| <b>Female</b>                                            | 2019 (48.7%)        | 1083 (49.5%)                | 936 (47.8%)                   | 0.296          |
| <b>Race</b>                                              |                     |                             |                               |                |
| White                                                    | 3017 (72.7%)        | 1737 (79.3%)                | 1280 (65.3%)                  | < 0.001        |
| Black                                                    | 875 (21.1%)         | 336 (15.3%)                 | 539 (27.5%)                   |                |
| Other                                                    | 107 (2.6%)          | 34 (1.6%)                   | 73 (3.7%)                     |                |
| Missing                                                  | 150 (3.6%)          | 83 (3.8%)                   | 67 (3.4%)                     |                |
| <b>Marital Status</b>                                    |                     |                             |                               |                |
| Married                                                  | 2321 (55.9%)        | 1346 (61.5%)                | 975 (49.8%)                   | < 0.001        |
| Single                                                   | 943 (22.7%)         | 425 (19.4%)                 | 518 (26.4%)                   |                |
| Divorced                                                 | 349 (8.4%)          | 173 (7.9%)                  | 176 (9.0%)                    |                |
| Widowed                                                  | 377 (9.1%)          | 166 (7.6%)                  | 211 (10.8%)                   |                |
| Missing                                                  | 159 (3.8%)          | 80 (3.7%)                   | 79 (4.0%)                     |                |
| <b>Median Income by Zip Code (x \$1,000) , mean (SD)</b> | 50.7 (17.8)         | 52.7 (17.9)                 | 48.3 (17.3)                   | < 0.001        |
| <b>Systolic Blood Pressure (mm Hg), mean (SD)</b>        | 129.7 (18.7)        | 129.8 (18.3)                | 129.7 (19.1)                  | 0.895          |
| <b>Diastolic Blood Pressure (mm Hg), mean (SD)</b>       | 74.7 (12.6)         | 76.1 (12.4)                 | 73.2 (12.6)                   | < 0.001        |
| <b>Pulse Rate (beats per minute), mean (SD)</b>          | 75.3 (13.4)         | 75.1 (13.5)                 | 75.6 (13.3)                   | 0.190          |
| <b>BMI (kg/m<sup>2</sup>), median (IQR)</b>              | 28 (24, 32)         | 28 (24, 32)                 | 27 (24, 32)                   | 0.272          |
| <b>Cancer</b>                                            | 828 (20.0%)         | 459 (21.0%)                 | 369 (18.8%)                   | 0.095          |
| <b>Chronic Renal Failure</b>                             | 341 (8.2%)          | 145 (6.6%)                  | 196 (10.0%)                   | < 0.001        |
| <b>Diabetes</b>                                          | 1055 (25.4%)        | 500 (22.8%)                 | 555 (28.3%)                   | < 0.001        |
| <b>Depression</b>                                        | 603 (14.5%)         | 318 (14.5%)                 | 285 (14.5%)                   | 1.000          |
| <b>Coronary Artery Disease</b>                           | 665 (16.0%)         | 320 (14.6%)                 | 345 (17.6%)                   | 0.010          |
| <b>Hypertension</b>                                      | 2055 (49.5%)        | 1030 (47.0%)                | 1025 (52.3%)                  | < 0.001        |
| <b>Atrial Fibrillation</b>                               | 504 (12.1%)         | 255 (11.6%)                 | 249 (12.7%)                   | 0.316          |
| <b>Active Antidepressant(s) Prescription</b>             | 979 (23.6%)         | 529 (24.2%)                 | 450 (23.0%)                   | 0.390          |
| <b>Stroke Type</b>                                       |                     |                             |                               |                |
| Ischemic Stroke                                          | 2700 (65.1%)        | 1396 (63.7%)                | 1304 (66.6%)                  | 0.083          |
| Transient Ischemic Attack                                | 681 (16.4%)         | 380 (17.4%)                 | 301 (15.4%)                   |                |
| Intracerebral Hemorrhage                                 | 410 (9.9%)          | 210 (9.6%)                  | 200 (10.2%)                   |                |
| Subarachnoid Hemorrhage                                  | 358 (8.6%)          | 204 (9.3%)                  | 154 (7.9%)                    |                |
| <b>Days Since Stroke, median (IQR)</b>                   | 63 (32, 340)        | 67 (32, 389)                | 59 (31, 267)                  | 0.010          |
| <b>NIHSS Score, median (IQR)</b>                         | 0 (0, 1)            | 0 (0, 1)                    | 0 (0, 2)                      | < 0.001        |
| <b>NIHSS Score Categorized</b>                           |                     |                             |                               |                |
| 0                                                        | 2214 (53.4%)        | 1244 (56.8%)                | 970 (49.5%)                   | < 0.001        |
| 1-5                                                      | 1137 (27.4%)        | 529 (24.2%)                 | 608 (31.0%)                   |                |

|                                                  |             |             |             |         |
|--------------------------------------------------|-------------|-------------|-------------|---------|
| >5                                               | 249 (6.0%)  | 79 (3.6%)   | 170 (8.7%)  |         |
| Missing                                          | 549 (13.2%) | 338 (15.4%) | 211 (10.8%) |         |
| <b>Modified Rankin Scale Score, median (IQR)</b> | 1 (0, 2)    | 1 (0, 2)    | 1 (1, 2)    | < 0.001 |

Patients were excluded from the analysis if they did not complete the PROMIS sleep disturbance scale during the study period. SD = standard deviation; BMI = body mass index; IQR = interquartile range; NIHSS= National Institutes of Health Stroke Scale

**Table S2. Characteristics of patients in the study cohort according to whether or not they had more than one visit with patient-reported outcome data.**

| <b>Patient Characteristics</b>                                   | <b>All Patients</b> | <b>Study Cohort</b> | <b>Excluded</b> | <b>P-value</b> |
|------------------------------------------------------------------|---------------------|---------------------|-----------------|----------------|
| N                                                                | 2190                | 476                 | 1714            |                |
| Age, mean (SD)                                                   | 60.7 (14.8)         | 59.7 (13.6)         | 61.0 (15.1)     | 0.065          |
| Female                                                           | 1083 (49.5%)        | 253 (53.2%)         | 830 (48.4%)     | 0.076          |
| <b>Race</b>                                                      |                     |                     |                 |                |
| White                                                            | 1737 (79.3%)        | 404 (84.9%)         | 1333 (77.8%)    | 0.002          |
| Black                                                            | 336 (15.3%)         | 49 (10.3%)          | 287 (16.7%)     |                |
| Other                                                            | 34 (1.6%)           | 9 (1.9%)            | 25 (1.5%)       |                |
| Missing                                                          | 83 (3.8%)           | 14 (2.9%)           | 69 (4.0%)       |                |
| <b>Marital Status</b>                                            |                     |                     |                 |                |
| Married                                                          | 1346 (61.5%)        | 311 (65.3%)         | 1035 (60.4%)    | 0.168          |
| Single                                                           | 425 (19.4%)         | 90 (18.9%)          | 335 (19.5%)     |                |
| Divorced                                                         | 173 (7.9%)          | 37 (7.8%)           | 136 (7.9%)      |                |
| Widowed                                                          | 166 (7.6%)          | 26 (5.5%)           | 140 (8.2%)      |                |
| Missing                                                          | 80 (3.7%)           | 12 (2.5%)           | 68 (4.0%)       |                |
| <b>Median Income by Zip Code (x \$1,000), mean (SD)</b>          | 52.7 (17.9)         | 53.9 (17.2)         | 52.4 (18.1)     | 0.098          |
| Cancer                                                           | 480 (21.9%)         | 88 (18.5%)          | 392 (22.9%)     | 0.047          |
| Chronic Renal Failure                                            | 164 (7.5%)          | 20 (4.2%)           | 144 (8.4%)      | 0.003          |
| Diabetes                                                         | 539 (24.6%)         | 93 (19.5%)          | 446 (26.0%)     | 0.004          |
| Depression                                                       | 343 (15.7%)         | 66 (13.9%)          | 277 (16.2%)     | 0.251          |
| Coronary Artery Disease                                          | 336 (15.3%)         | 57 (12.0%)          | 279 (16.3%)     | 0.026          |
| Hypertension                                                     | 1082 (49.4%)        | 232 (48.7%)         | 850 (49.6%)     | 0.782          |
| Atrial Fibrillation                                              | 278 (12.7%)         | 50 (10.5%)          | 228 (13.3%)     | 0.122          |
| <b>Stroke Subtype</b>                                            |                     |                     |                 |                |
| Ischemic                                                         | 1396 (63.7%)        | 303 (63.7%)         | 1093 (63.8%)    | < 0.001        |
| Transient Ischemic Attack                                        | 380 (17.4%)         | 58 (12.2%)          | 322 (18.8%)     |                |
| Intracerebral hemorrhage                                         | 210 (9.6%)          | 56 (11.8%)          | 154 (9.0%)      |                |
| Subarachnoid hemorrhage                                          | 204 (9.3%)          | 59 (12.4%)          | 145 (8.5%)      |                |
| <b>Days Since Stroke, median (IQR)</b>                           | 98 (38, 462.5)      | 76 (32, 332)        | 105 (41, 527.5) | < 0.001        |
| <b>NIHSS Score, median (IQR)</b>                                 | 0 (0, 1)            | 0 (0, 1)            | 0 (0, 1)        | 0.449          |
| <b>Modified Rankin Scale Score, median (IQR)</b>                 | 1 (0, 2)            | 1 (1, 2)            | 1 (0, 2)        | 0.001          |
| <b><u>Patient-reported outcome measure scores, mean (SD)</u></b> |                     |                     |                 |                |
| PROMIS Sleep Disturbance                                         | 49.8 (10.4)         | 49.3 (10.6)         | 50.0 (10.4)     | 0.183          |
| PHQ-9 on PROMIS Metric                                           | 49.8 (10.7)         | 50.2 (10.0)         | 49.7 (10.9)     | 0.347          |
| PROMIS Physical Function*                                        | 41.6 (10.5)         | 40.9 (10.2)         | 41.8 (10.6)     | 0.111          |
| PROMIS Fatigue                                                   | 53.3 (10.5)         | 53.5 (10.4)         | 53.2 (10.6)     | 0.500          |
| PROMIS Anxiety                                                   | 52.8 (10.2)         | 52.4 (10.0)         | 52.8 (10.2)     | 0.422          |
| PROMIS Pain Interference                                         | 52.6 (10.6)         | 52.1 (10.5)         | 52.8 (10.7)     | 0.228          |
| PROMIS Satisfaction with Social Roles*                           | 45.1 (11.3)         | 44.5 (10.8)         | 45.2 (11.5)     | 0.209          |
| NeuroQol Cognitive Function*                                     | 46.7 (10.3)         | 46.1 (9.9)          | 46.8 (10.4)     | 0.359          |

Patients were included in the study cohort if they completed PROMs twice during study period). \*Higher scores indicate better functioning. IQR=interquartile range, SD=standard deviation, PHQ-9 =patient health questionnaire-9; NIHSS = National Institutes of Health Stroke Scale; PROMIS = Patient-Reported Outcome Measurement Information System

**Table S3. Results of multivariable linear regression models where PROMIS Sleep Disturbance score was the dependent variable for full sample**

| N = 2,190                                   | Physical Function <sup>†</sup> |         | Anxiety                 |         | Fatigue                 |         | Pain Interference       |         | Social Role Satisfaction <sup>†</sup> |         | Cognitive Function <sup>†</sup> |         |
|---------------------------------------------|--------------------------------|---------|-------------------------|---------|-------------------------|---------|-------------------------|---------|---------------------------------------|---------|---------------------------------|---------|
|                                             | Estimate (95% CI)              | P-value | Estimate (95% CI)       | P-value | Estimate (95% CI)       | P-value | Estimate (95% CI)       | P-value | Estimate (95% CI)                     | P-value | Estimate (95% CI)               | P-value |
| <b>Age (per year)</b>                       | -0.06<br>(-0.09, -0.03)        | < 0.001 | -0.04<br>(-0.07, -0.02) | 0.001   | -0.05<br>(-0.08, -0.03) | < 0.001 | -0.05<br>(-0.08, -0.02) | < 0.001 | -0.05<br>(-0.08, -0.02)               | < 0.001 | -0.05<br>(-0.08, -0.03)         | < 0.001 |
| <b>Male (vs. Female)</b>                    | 0.00<br>(-0.75, 0.75)          | 0.995   | 0.36<br>(-0.37, 1.09)   | 0.333   | 0.30<br>(-0.43, 1.03)   | 0.417   | 0.11<br>(-0.62, 0.84)   | 0.763   | -0.04<br>(-0.79, 0.70)                | 0.906   | 0.04<br>(-0.71, 0.78)           | 0.923   |
| <b>Race (vs. White)</b>                     |                                |         |                         |         |                         |         |                         |         |                                       |         |                                 |         |
| Black                                       | -0.18<br>(-1.27, 0.90)         | 0.739   | -0.20<br>(-1.26, 0.85)  | 0.705   | -0.11<br>(-1.17, 0.95)  | 0.836   | -0.52<br>(-1.57, 0.53)  | 0.327   | -0.28<br>(-1.36, 0.80)                | 0.610   | -0.14<br>(-1.22, 0.94)          | 0.802   |
| Other                                       | 1.85<br>(-1.03, 4.73)          | 0.208   | 1.36<br>(-1.43, 4.16)   | 0.338   | 1.71<br>(-1.10, 4.51)   | 0.233   | 2.09<br>(-0.70, 4.88)   | 0.142   | 1.90<br>(-0.94, 4.74)                 | 0.189   | 1.63<br>(-1.24, 4.49)           | 0.266   |
| <b>Marital Status (vs. Married)</b>         |                                |         |                         |         |                         |         |                         |         |                                       |         |                                 |         |
| Single                                      | 0.18<br>(-0.83, 1.18)          | 0.730   | 0.00<br>(-0.98, 0.97)   | 0.992   | 0.37<br>(-0.61, 1.35)   | 0.455   | 0.09<br>(-0.88, 1.07)   | 0.856   | 0.23<br>(-0.77, 1.22)                 | 0.657   | 0.17<br>(-0.82, 1.16)           | 0.734   |
| Divorced                                    | 0.82<br>(-0.55, 2.18)          | 0.241   | 0.70<br>(-0.63, 2.03)   | 0.304   | 0.64<br>(-0.69, 1.97)   | 0.344   | 0.53<br>(-0.81, 1.86)   | 0.439   | 0.58<br>(-0.77, 1.93)                 | 0.398   | 0.74<br>(-0.61, 2.09)           | 0.283   |
| Widowed                                     | 1.18<br>(-0.26, 2.63)          | 0.108   | 1.17<br>(-0.24, 2.57)   | 0.104   | 1.27<br>(-0.14, 2.68)   | 0.078   | 1.28<br>(-0.12, 2.68)   | 0.073   | 1.32<br>(-0.11, 2.76)                 | 0.071   | 1.24<br>(-0.20, 2.68)           | 0.090   |
| <b>Median Income (per \$10,000)*</b>        | -0.10<br>(-0.32, 0.12)         | 0.382   | -0.09<br>(-0.31, 0.12)  | 0.382   | -0.10<br>(-0.31, 0.12)  | 0.376   | -0.05<br>(-0.27, 0.16)  | 0.626   | -0.08<br>(-0.30, 0.14)                | 0.473   | -0.09<br>(-0.31, 0.13)          | 0.443   |
| <b>mRS (vs. 0-1)</b>                        |                                |         |                         |         |                         |         |                         |         |                                       |         |                                 |         |
| 2-3                                         | -0.85<br>(-1.76, 0.06)         | 0.068   | -0.53<br>(-1.36, 0.31)  | 0.217   | -0.83<br>(-1.66, 0.01)  | 0.052   | -0.73<br>(-1.56, 0.10)  | 0.084   | -1.23<br>(-2.12, -0.35)               | 0.006   | -0.91<br>(-1.76, -0.07)         | 0.034   |
| 4-5                                         | -3.31<br>(-5.49, -1.13)        | 0.003   | -2.78<br>(-4.78, -0.77) | 0.007   | -3.01<br>(-4.98, -1.04) | 0.003   | -2.91<br>(-4.90, -0.92) | 0.004   | -3.83<br>(-5.88, -1.78)               | < 0.001 | -3.39<br>(-5.39, -1.39)         | < 0.001 |
| <b>Days Since Stroke (vs. &lt; 90 days)</b> |                                |         |                         |         |                         |         |                         |         |                                       |         |                                 |         |
| 90-365                                      | 1.16<br>(0.09, 2.23)           | 0.033   | 1.18<br>(0.14, 2.22)    | 0.026   | 1.02<br>(-0.03, 2.07)   | 0.056   | 0.89<br>(-0.15, 1.93)   | 0.093   | 1.20<br>(0.14, 2.27)                  | 0.027   | 1.04<br>(-0.04, 2.12)           | 0.060   |
| > 365                                       | 0.54<br>(-0.40, 1.49)          | 0.259   | 0.75<br>(-0.17, 1.67)   | 0.111   | 0.48<br>(-0.42, 1.38)   | 0.294   | 0.15<br>(-0.80, 1.10)   | 0.752   | 0.66<br>(-0.26, 1.58)                 | 0.161   | 0.38<br>(-0.55, 1.31)           | 0.421   |
| <b>PHQ-9 on PROMIS Metric</b>               | 0.53<br>(0.49, 0.57)           | < 0.001 | 0.37<br>(0.32, 0.42)    | < 0.001 | 0.37<br>(0.32, 0.42)    | < 0.001 | 0.45<br>(0.41, 0.49)    | < 0.001 | 0.47<br>(0.43, 0.51)                  | < 0.001 | 0.47<br>(0.42, 0.52)            | < 0.001 |
| <b>PRO Score</b>                            | -0.06<br>(-0.11, -0.01)        | 0.010   | 0.28<br>(0.22, 0.33)    | < 0.001 | 0.26<br>(0.21, 0.31)    | < 0.001 | 0.22<br>(0.18, 0.26)    | < 0.001 | -0.15<br>(-0.19, -0.10)               | < 0.001 | -0.15<br>(-0.20, -0.09)         | < 0.001 |

\*Median household income estimated from ZIP code. †Higher scores indicate better function.

mRS= modified Rankin Scale; PHQ-9 = Patient Health Questionnaire 9 depression screen; PROMIS = Patient-Reported Outcome Measurement Information System

**Table S4. Effect of baseline PROMIS sleep disturbance score on change in PROMIS and NeuroQoL domain scores in multivariable models that include modified version of the PHQ-9 scale with sleep item removed**

| <b>Dependent Variable</b>                             | <b>Estimate of PROMIS Sleep Disturbance (95% Confidence Interval)</b> | <b>Holm-Adjusted P-value</b> |
|-------------------------------------------------------|-----------------------------------------------------------------------|------------------------------|
| <b>PHQ-9 on PROMIS Metric (N=428)</b>                 | <b>0.25 (0.17, 0.33)</b>                                              | <b>&lt; 0.001</b>            |
| <b>PROMIS Physical Function (N=468)*</b>              | <b>-0.14 (-0.20, -0.08)</b>                                           | <b>&lt; 0.001</b>            |
| <b>PROMIS Fatigue (N=459)</b>                         | <b>0.17 (0.09, 0.24)</b>                                              | <b>&lt; 0.001</b>            |
| <b>PROMIS Anxiety (N=455)</b>                         | <b>0.11 (0.03, 0.19)</b>                                              | <b>0.016</b>                 |
| <b>PROMIS Pain Interference (N=438)</b>               | <b>0.08 (0.00, 0.15)</b>                                              | <b>0.110</b>                 |
| <b>PROMIS Satisfaction with Social Roles (N=431)*</b> | <b>-0.17 (-0.26, -0.08)</b>                                           | <b>&lt; 0.001</b>            |
| <b>NeuroQoL Cognitive Function (N=332)*</b>           | <b>-0.08 (-0.21, 0.04)</b>                                            | <b>0.186</b>                 |

In each model, the dependent variable is the follow-up PROMIS/NeuroQoL domain score, and the independent variable is the baseline PROMIS sleep disturbance score. Covariate includes corresponding baseline PROMIS/NeuroQoL score and the variables: baseline PHQ-8 score (sleep item removed from the PHQ-9 scale), age, sex, race, marital status, median income by ZIP code, baseline modified Rankin Scale score, time since stroke, and interval between PROM measurements. \*higher scores indicate better functioning
